# Supplementary material
Source: PubMed Central journal article supplement (PMC1458937)

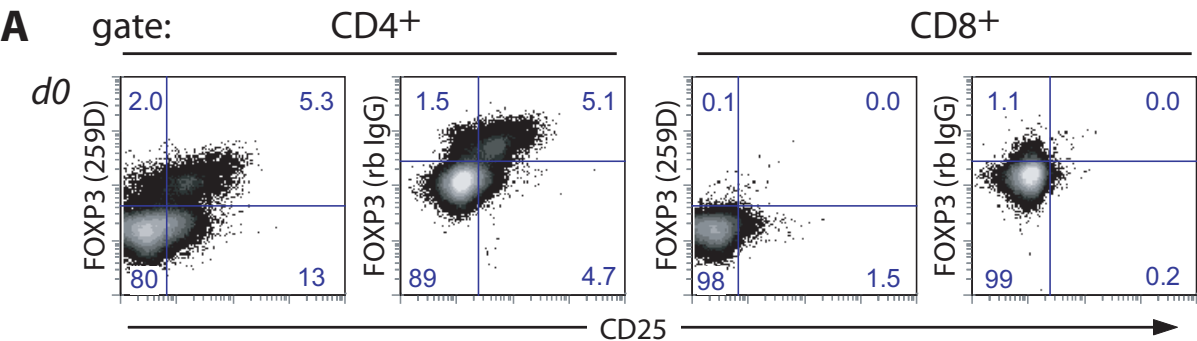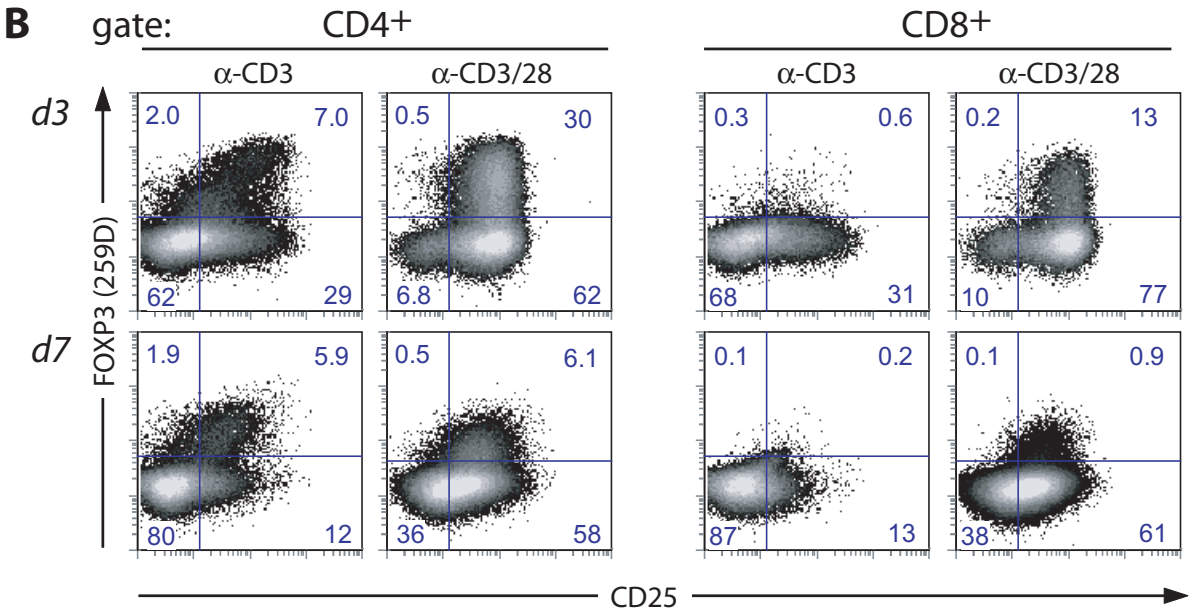

Supplement: pnas_0509484103_2.pdf [file pnas_0509484103_2.pdf]

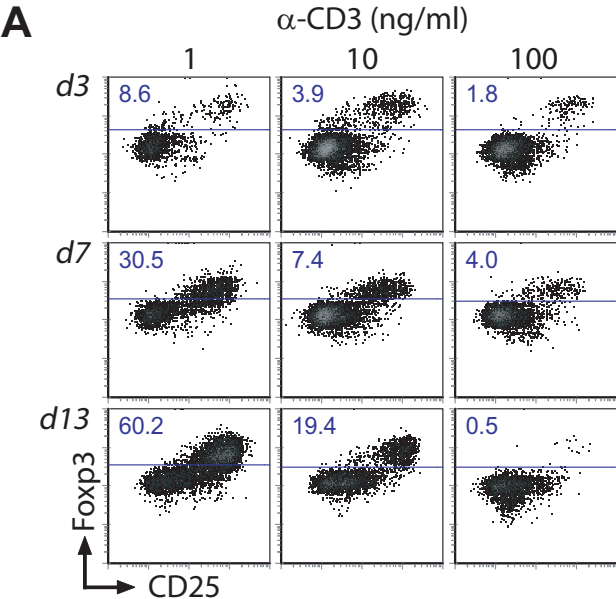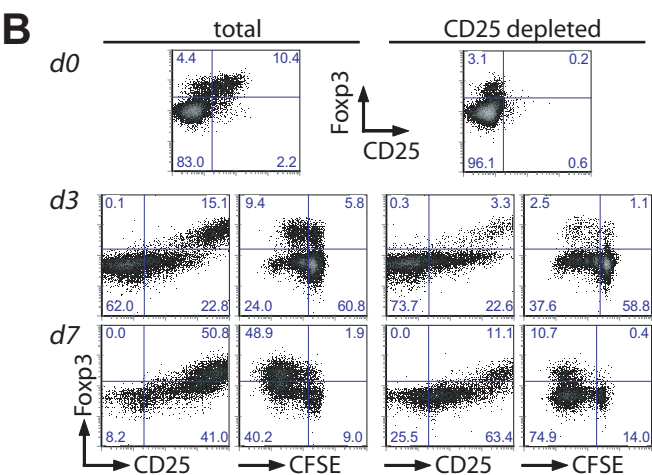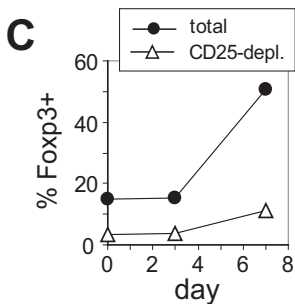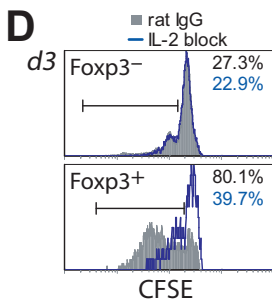

Supplement: pnas_0509484103_3.pdf [file pnas_0509484103_3.pdf]

*d0**d3**d7*CD4<sup>+</sup>CD8<sup>+</sup>CD4<sup>+</sup>CD8<sup>+</sup>CD4<sup>+</sup>CD8<sup>+</sup>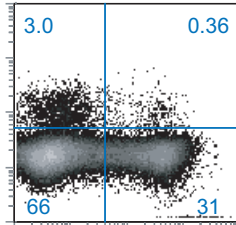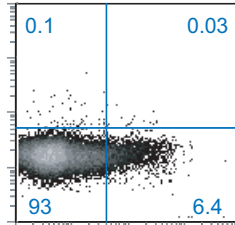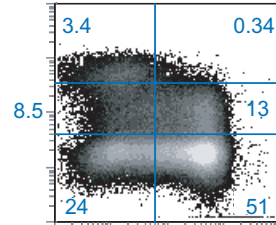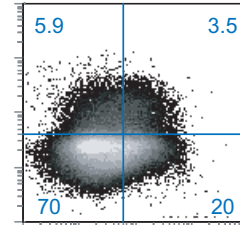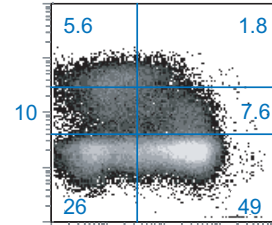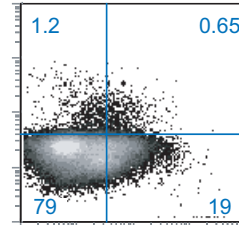

IL-2

FOXP3

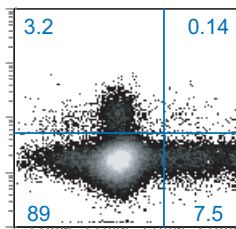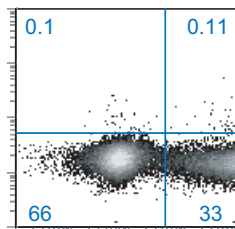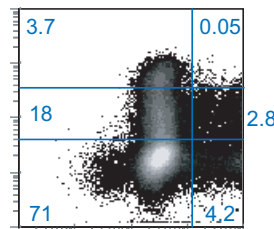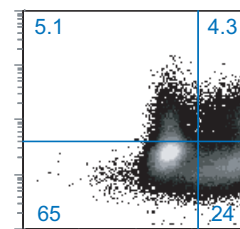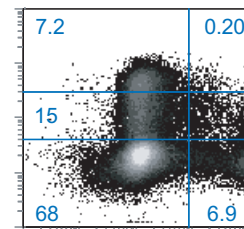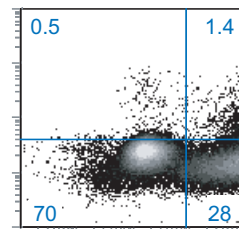IFN- $\gamma$ 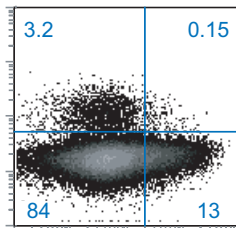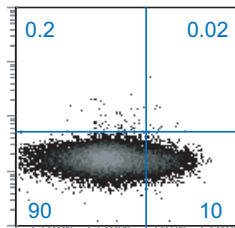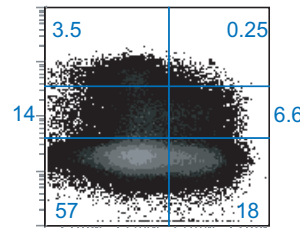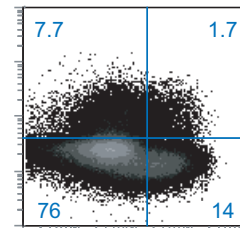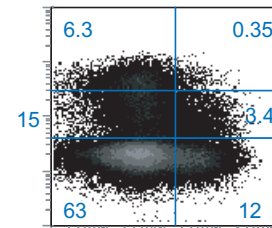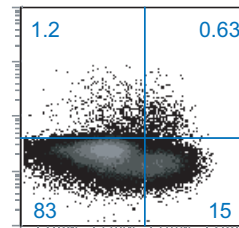TNF- $\alpha$

Supplement: pnas_0509484103_4.pdf [file pnas_0509484103_4.pdf]

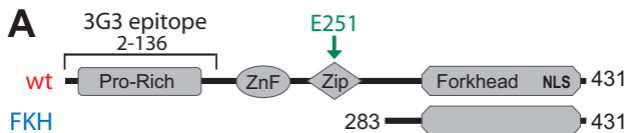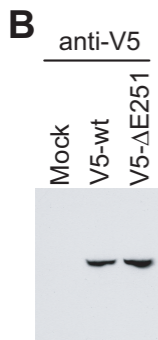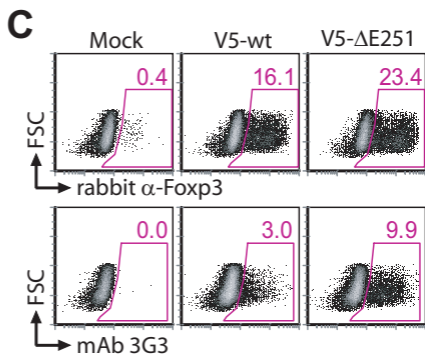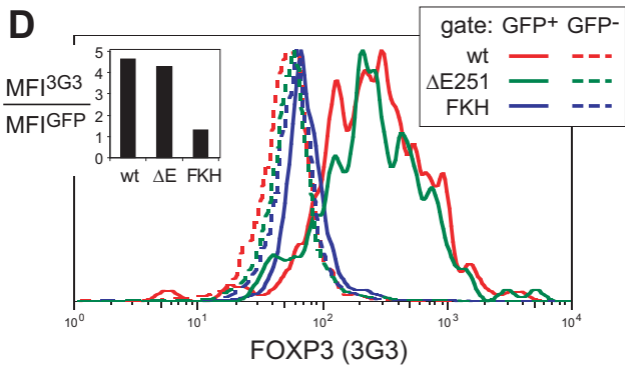

Supplement: pnas_0509484103_5.pdf [file pnas_0509484103_5.pdf]

CD8<sup>+</sup> gated PBMC

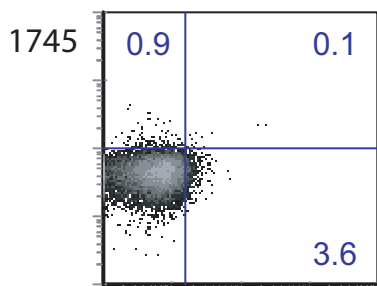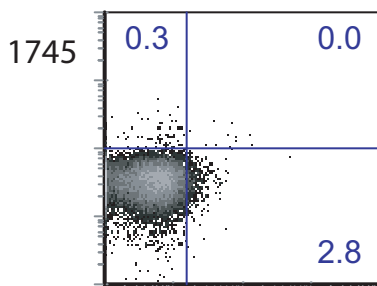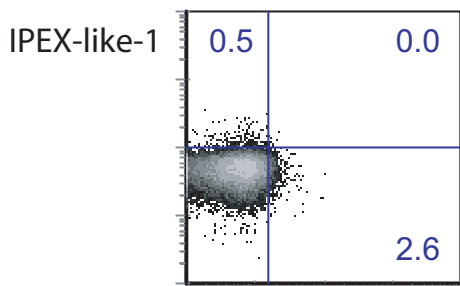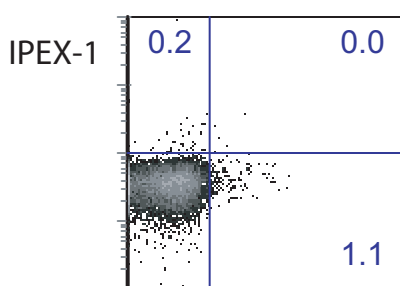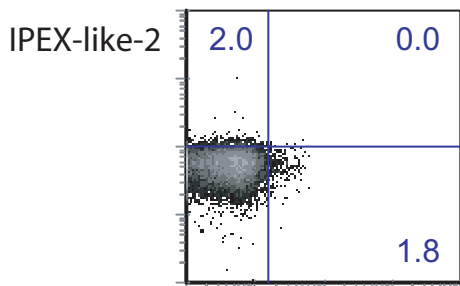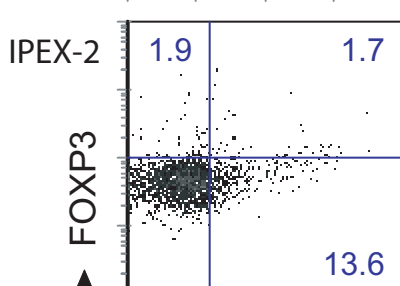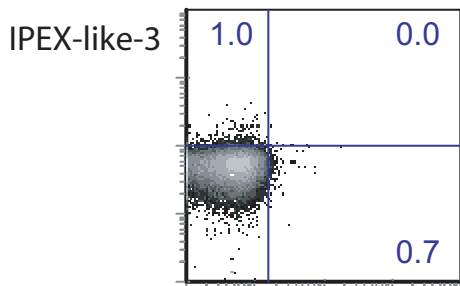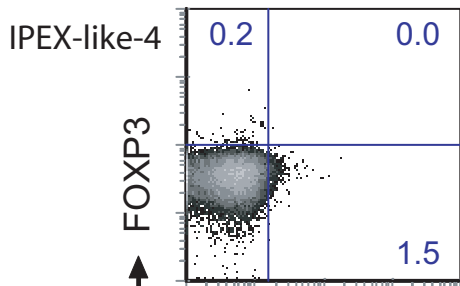

FOXP3  
CD25

Supplement: pnas_0509484103_6.pdf [file pnas_0509484103_6.pdf]
